# Supplementary material for: Uncertainty and variability in models of the cardiac action potential: Can we build trustworthy models?
Source: PubMed Central journal article supplement (PMC4915860; doi:10.1016/j.yjmcc.2015.11.018), 2016-07
Supplement: mmc1.pdf [file mmc1.pdf]

Supplementary Material for:  
Uncertainty and variability in models of the cardiac action potential:  
can we build trustworthy models?

Ross H. Johnstone, Eugene T. Y. Chang, Rémi Bardenet, Teun P. de Boer,  
David J. Gavaghan, Richard H. Clayton, Gary R. Mirams & Pras Pathmanathan

October 13, 2015

## Contents

|          |                                                                                           |           |
|----------|-------------------------------------------------------------------------------------------|-----------|
| <b>A</b> | <b>Steady state <math>I_{Na}</math> inactivation: intra- vs. inter-animal variability</b> | <b>2</b>  |
| <b>B</b> | <b>Case Study 1: Further Details</b>                                                      | <b>4</b>  |
| B1       | Numerical Methods . . . . .                                                               | 4         |
| B2       | Likelihood . . . . .                                                                      | 4         |
| B3       | Pre-MCMC CMA-ES minimisation . . . . .                                                    | 5         |
| B4       | Adaptive Metropolis-Hastings algorithm . . . . .                                          | 6         |
| B5       | Additional methods for simulation of canine patch-clamp experiment . . . . .              | 6         |
| B6       | Additional results for Section 2.2 . . . . .                                              | 9         |
| B6.1     | Prediction of beat-to-beat variability in a canine myocyte . . . . .                      | 12        |
| <b>C</b> | <b>Case Study 2: introduction to GP emulators</b>                                         | <b>13</b> |
| C1       | Simple example . . . . .                                                                  | 13        |
| C2       | Emulator implementation . . . . .                                                         | 14        |
| C3       | Emulator validation . . . . .                                                             | 15        |
| C4       | Emulator Implementation . . . . .                                                         | 16        |

# Supplementary Material

## A Steady state $I_{Na}$ inactivation: intra- vs. inter-animal variability

The results of Pathmanathan et al. (2015), as illustrated in Figure 1, use data from 16 canine endocardial myocytes, originally published in Cordeiro et al. (2008). These data were obtained from multiple animals in experiments that took place over the course of over one year. Seven animals contributed a single cell to the dataset, three animals contributed two cells, and one animal three cells. In Pathmanathan et al. (2015), inter-subject vs intra-subject variability was not assessed. Here we present a short preliminary analysis of inter- vs inter-subject variability, and discuss how this variability could be statistically quantified.

Figure A1, top-left, plots the same data as Figure 1, top-right, but with lines connecting cells from the same animal, so that inter- and intra-animal variability can be easily visualised. The remaining panels show the same results using three other canine datasets: data from 15 epicardial cells originally published in Cordeiro et al. (2008), and data from 10 epi and 10 endocardial cells originally published in Murphy et al. (2011). All four datasets were used in Pathmanathan et al. (2015). Note that the axis scales are quite different. For a discussion on the differences between epi- vs endocardial cells, and on differences between the Cordeiro et al. (2008) and Murphy et al. (2011) datasets, see Pathmanathan et al. (2015).

The results do not display obvious clustering for cells from the same animal, although a visual inspection suggests correlation in  $V_0$  and  $K$  for cells from the same animal cannot be ruled out. It is important to realise that the non-linear mixed effects (NLME) method that was used to analyse the data also provides a framework for including these different sources of variability. The function that was fit to the data was the sigmoid  $F(V; V_0, K) = 1/(1 + \exp((V - V_0)/K))^2$ . Let  $\mathbf{q} = (V_0, \ln(K))$ . The statistical model that was used in Pathmanathan et al. (2015) was

$$\mathbf{q}_i = \mathbf{q}^* + \mathbf{b}_i, \tag{A.1}$$

where  $i$  is cell index,  $\mathbf{q}^*$  is the fixed effect (red star in Figure 1), and  $\mathbf{b}_i$  is the random effect, corresponding to cell-to-cell variability. The  $\mathbf{b}_i$  were assumed to be Normally distributed with mean zero and covariance matrix  $\Psi$ . The NLME procedure simultaneously estimates  $\mathbf{q}^*$  and  $\Psi$ . This can be extended to account for inter- and intra-animal variability, for example by replacing the statistical model (A.1) with

$$\mathbf{q}_{ij} = \mathbf{q}^* + \mathbf{a}_i + \mathbf{b}_{ij}, \tag{A.2}$$

where  $i$  is animal index and  $j$  cell index, and where we could assume  $\mathbf{a}_i \sim N(0, \Psi_a)$  and  $\mathbf{b}_{ij} \sim N(0, \Psi_b)$ . The NLME method can be used to estimate  $\mathbf{q}^*$ ,  $\Psi_a$  and  $\Psi_b$ . More general statistical models are also possible, such as  $\mathbf{b}_{ij} \sim N(0, \Psi_b(\mathbf{a}_i))$ , which corresponds to the amount of intra-subject variability being subject-dependent.

Analyses such as these should provide deeper understanding of natural variability, although estimating the unknown quantities in the above formulation may require more data than presented in Figure A1, in which data from only a single cell is available for many of the animals. Other factors such as age and gender may also influence inactivation, and in addition Figure A1 shows that transmural location affects inactivation properties (see Pathmanathan et al. (2015)). These observations emphasise how developing a full quantitative understanding of natural variability, even just for this aspect of cardiac electrophysiology, is a major experimental and statistical task.

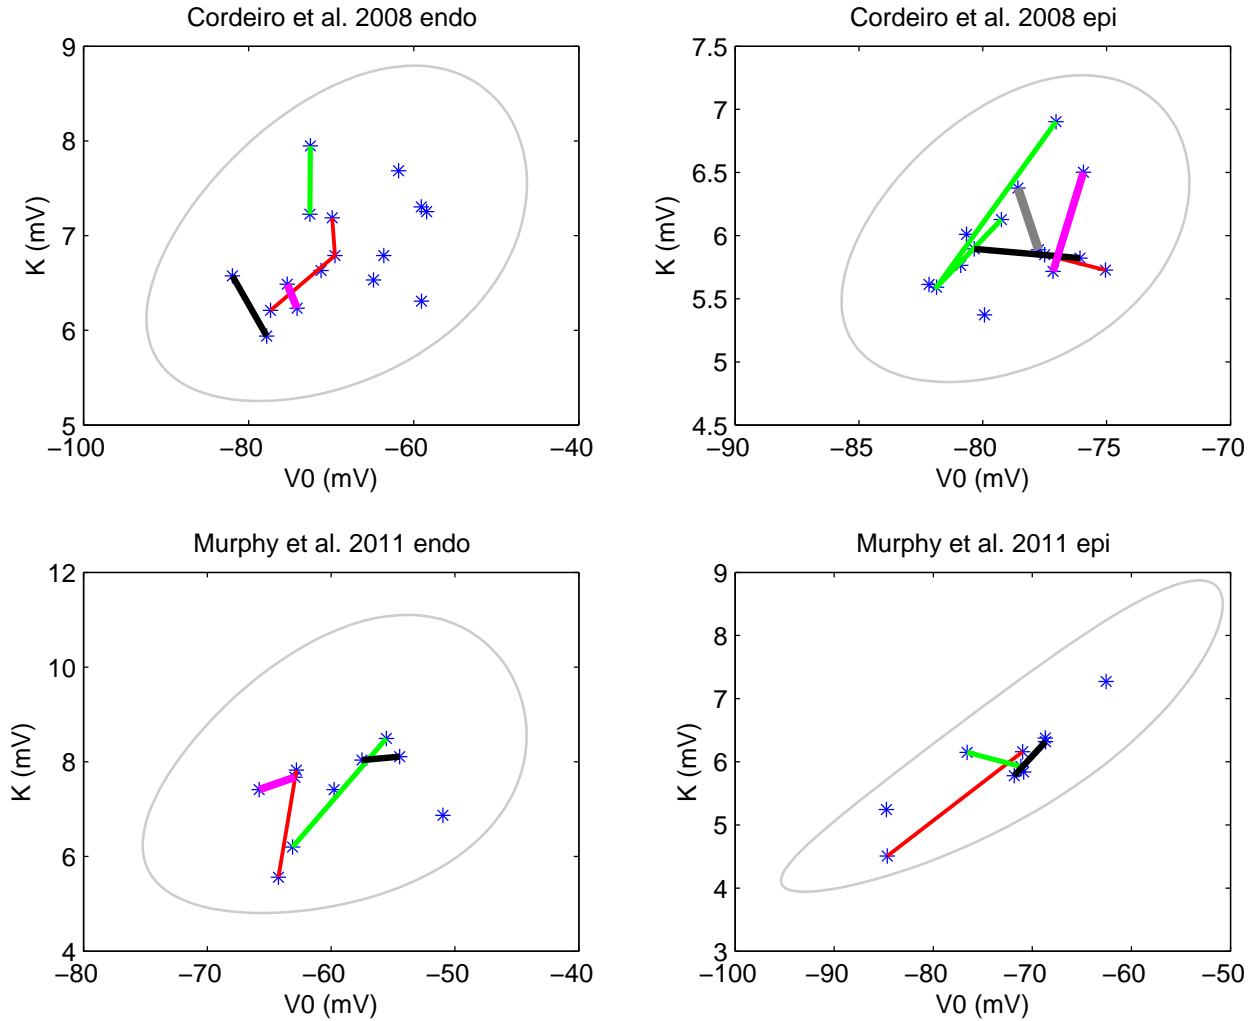

Figure A1: Results of the NLME fitting process for four separate canine steady state  $I_{Na}$  inactivation datasets. Stars are the values corresponding to individual cells, the grey line is the 99% prediction region. Coloured lines connect cells which originated from the same animal. The colours are for ease of visualisation only, so for example the green line in the top-left sub-figure does *not* correspond to the same animal as the green line in the top-right sub-figure. Note the different axis scales.

## 40 B Case Study 1: Further Details

### 41 B1 Numerical Methods

42 The action potential models were downloaded in XML format from the CellML repository (Lloyd  
43 et al., 2008). The equations were converted into and solved in C++ using a CVODE solver within the  
44 Chaste framework (Mirams et al., 2013; Cooper et al., 2014). The relative and absolute tolerances  
45 for the CVODE solver were  $10^{-7}$  and  $10^{-9}$ , respectively. The sampling time of the CVODE solver  
46 was set to 0.2 ms. The maximum number of steps the CVODE solver can take in its attempt to  
47 reach the next output time was set to 5000. This last condition was set to solve a numerical problem  
48 we were having where the proposal traces had a ‘notch’ in them which made acceptance of new  
49 states very unlikely, and so the chain became stuck at some set of parameter values. Increasing the  
50 maximum number of steps smoothed out the trace for the same parameter values so that MCMC  
51 could proceed as normal.

52 The CMA-ES minimisation (Hansen, 2006) was implemented in Python. The objective function  
53 to be minimised was the negative of the log-likelihood returned by Chaste. The default options were  
54 used. The source code is available at [https://www.lri.fr/~hansen/cmaes\\_inmatlab.html](https://www.lri.fr/~hansen/cmaes_inmatlab.html).

55 A custom written Python script was used to perform the MCMC. It interfaced with C++ by  
56 sending a set of parameters to Chaste and waiting for a log-likelihood to be returned by Chaste  
57 before performing the adaptive MCMC steps and moving onto the next iteration. The Python script  
58 uses the NumPy library (Van Der Walt et al., 2011). The figures were produced using `matplotlib`  
59 (Hunter, 2007).

60 A bolt-on project called `Jmcc_UQ`, compatible with the computational biology C++ library  
61 Chaste (v3.3), is available to download from <http://www.cs.ox.ac.uk/chaste/download.html>,  
62 it contains all the necessary code to reproduce Case Study 1.

### 63 B2 Likelihood

64 Given our simulated data, we compute the likelihood of observing this data given a certain set of  
65 parameters. We make the assumptions:

- 66 • The only source of error in our measurements is that of experimental noise. In other words,  
67 that the measured data is Normally distributed around some true value, with a standard  
68 deviation of  $\sigma$  mV.
- 69 • We treat  $\sigma$  as an unknown parameter to be inferred, along with the maximal conductance  
70 parameters.
- 71 • The values of the noise around the true solution at each time point are independently dis-  
72 tributed.
- 73 • We have a rough idea of what the parameters are; prior knowledge can be accurately repre-  
74 sented by a uniform distribution across large intervals (which we choose to be from  $0.1 \times$  (the  
75 true parameter value) to  $10 \times$  (the true parameter value)). Their joint prior distribution is  
76 given by Equation (B.3).

$$p(\boldsymbol{\theta}, \sigma) = \begin{cases} c & \{\boldsymbol{\theta}, \sigma\} \text{ in some hypercuboid,} \\ 0 & \text{otherwise,} \end{cases} \quad (\text{B.3})$$

77 where  $c$  is a non-zero finite normalising constant.

78 We generate a test trace by solving the model equations with the conductance parameters  $\boldsymbol{\theta}$ . We  
79 then compute the likelihood of this test trace given our experimental trace using Equation (B.4),

80 which is the product of (independent) Normal probability density functions.  $\mathbf{x}$  is the experimental  
 81 trace vector and  $\mathbf{f}(\boldsymbol{\theta})$  is the test trace vector. Both vectors have  $N$  entries.

$$L(\boldsymbol{\theta}, \sigma) = p(\text{data}|\{\boldsymbol{\theta}, \sigma\}) = \prod_{i=1}^N \mathcal{N}(x_i|f_i(\boldsymbol{\theta}), \sigma^2) = \prod_{i=1}^N \frac{1}{\sqrt{2\pi\sigma^2}} \exp\left(-\frac{(x_i - f_i(\boldsymbol{\theta}))^2}{2\sigma^2}\right). \quad (\text{B.4})$$

We often deal with very small values close to zero, so we take the natural log of the likelihood, giving:

$$\begin{aligned} l(\boldsymbol{\theta}, \sigma) &= \log(L(\{\boldsymbol{\theta}, \sigma\})) \\ &= -\frac{N}{2} \log(2\pi\sigma^2) - \frac{1}{2\sigma^2} \sum_{i=1}^N (x_i - f_i(\boldsymbol{\theta}))^2 \\ &= -\frac{N}{2} \log(2\pi) - N \log(\sigma) - \frac{1}{2\sigma^2} \sum_{i=1}^N (x_i - f_i(\boldsymbol{\theta}))^2 \end{aligned} \quad (\text{B.5})$$

82 Since the first term on the RHS of Equation (B.5) is constant for all proposed  $\boldsymbol{\theta}$ , it will cancel  
 83 with itself when we take differences of log-likelihoods later on. It is therefore enough to define

$$l(\boldsymbol{\theta}, \sigma) \propto -N \log(\sigma) - \frac{1}{2\sigma^2} \sum_{i=1}^N (x_i - f_i(\boldsymbol{\theta}))^2. \quad (\text{B.6})$$

84 where  $\propto$  means "up to an additional constant". For notational simplicity, we concatenate  $\boldsymbol{\theta}$  and  $\sigma$   
 85 into a single vector, which we will still call  $\boldsymbol{\theta}$ . We calculate the posterior probability density,  $\pi(\boldsymbol{\theta})$ ,  
 86 of a set of parameters  $\boldsymbol{\theta}$  using Bayes' rule:

$$\pi(\boldsymbol{\theta}) = p(\boldsymbol{\theta}|\text{data}) = \frac{p(\text{data}|\boldsymbol{\theta})p(\boldsymbol{\theta})}{\int_{\Theta} p(\text{data}|\boldsymbol{\theta})p(\boldsymbol{\theta}) d\boldsymbol{\theta}}. \quad (\text{B.7})$$

87 We are unable to integrate functions with respect to  $p(\boldsymbol{\theta}|\text{data})$  given in Equation (B.7), so we  
 88 sample from this distribution using MCMC to allow us to approximate these integrals.

### 89 **B3 Pre-MCMC CMA-ES minimisation**

90 Before starting our MCMC to sample from the probability distribution, we want some idea of where  
 91  $\pi(\boldsymbol{\theta})$  puts mass in the parameter space  $\Theta$ . We therefore run a CMA-ES (Hansen, 2006) minimiser  
 92 with objective function  $-l(\boldsymbol{\theta})$ . This will hopefully give us a point estimate for the greatest log-  
 93 likelihood. MCMC with a Gaussian proposal will work best if the mass is distributed around this  
 94 point, and that there are no other modes elsewhere. If several runs of CMA-ES only find one point  
 95 with the best log-likelihood, it is likely that the target distribution will be uni-modal.

96 We run the CMA-ES minimiser from a number of starting points in the unit hypercube. These  
 97 starting points are randomly sampled uniformly from this space. These values are then linearly  
 98 scaled to lie in the support of the prior given in Equation (B.3). The final values returned by the  
 99 minimiser are saved, and the one yielding the best log-likelihood is used as the starting point for  
 100 the MCMC, after being re-scaled. We have used the default options in CMA-ES, with an initial  
 101 step size of 0.1.

## 102 B4 Adaptive Metropolis-Hastings algorithm

103 We sample from this distribution using MCMC with Metropolis-Hastings<sup>1</sup> with adaptive covariance  
104 matrix, given in Algorithm 1. For the first  $1,000 \times (\text{number of parameters})$  iterations, there is  
105 no adaptation. This is to establish those directions in parameter space which are associated with  
106 good likelihood. After this, the covariance matrix of the multivariate Normal proposal distribution  
107 is updated at each iteration, taking into account the direction of accepted points. This adaptive  
108 covariance matrix aligns itself along directions with the best log-likelihoods, and a scalar multiple  
109 scales how wide the proposal distribution is.

110 After running the MCMC, we discard the first quarter of all the iterations as *burn-in*, during  
111 which time the chain is settling into its stationary distribution, which is our target distribution by  
112 construction. We let the MCMC run for long enough so that the initial stage of non-adaptivity is  
113 entirely contained within the burn-in and so is discarded.

114 We also perform *thinning* on the chain by only saving every 10<sup>th</sup> iteration. Practically, this  
115 reduces the output file size, and theoretically, this reduces auto-correlation of the samples, so that  
116 the chain intuitively better represents independent samples from the target probability distribution.

---

**Algorithm 1** Adaptive Metropolis-Hastings MCMC, continued in Algorithm 2.

---

```
1:  $\log(a_0) \leftarrow 0$ .
2:  $\theta_0$  determined by CMA-ES minimisation.
3:  $\mu_0 \leftarrow \theta_0$ .
4:  $\Sigma_0 \leftarrow D$ , where  $D$  is a diagonal matrix.
5:  $t := 0$ 
6: while  $t \leq 1000 \times (\text{number of parameters})$  do
7:   Given the current parameter state  $\theta_t$ , sample  $\theta^* \sim \mathcal{N}(\cdot | \theta_t, a_0 \Sigma_0)$ .
8:   if  $p(\theta^*) \neq 0$  then
9:     Compute  $\log(\alpha) = l(\theta^*) - l(\theta_t)$ .
10:    Sample  $u \sim \mathcal{U}(0, 1)$ .
11:    if  $u < \alpha$  then
12:       $\theta_{t+1} \leftarrow \theta^*$ .
13:       $accepted \leftarrow 1$ .
14:    else
15:       $\theta_{t+1} \leftarrow \theta_t$ .
16:       $accepted \leftarrow 0$ .
17:    end if
18:  else
19:     $\theta_{t+1} \leftarrow \theta_t$ .
20:     $accepted \leftarrow 0$ .
21:  end if
22:   $t++$ 
23: end while
```

---

## 117 B5 Additional methods for simulation of canine patch-clamp experiment

118 Figure B2 shows the periods of the experiment which were taken for this study, and provides an  
119 impression of the beat-to-beat variability of one aspect of the APs — their duration. The full

---

<sup>1</sup>Something Spanish? Beat heard accompanying steps (9)

---

**Algorithm 2** Adaptive Metropolis-Hastings MCMC continued from Algorithm 1.

---

```
24: loop
25:    $s \leftarrow t - 1000 \times (\text{number of parameters})$ .
26:    $\gamma_s \leftarrow (s + 1)^{-0.6}$ .
27:   Given the current parameter state  $\boldsymbol{\theta}_t$ , sample  $\boldsymbol{\theta}^* \sim \mathcal{N}(\cdot | \boldsymbol{\theta}_t, a_{s-1} \Sigma_{s-1})$ .
28:   if  $p(\boldsymbol{\theta}^*) \neq 0$  then
29:     Compute  $\log(\alpha) = l(\boldsymbol{\theta}^*) - l(\boldsymbol{\theta}_t)$ .
30:     Sample  $u \sim \mathcal{U}(0, 1)$ .
31:     if  $u < \alpha$  then
32:        $\boldsymbol{\theta}_{t+1} \leftarrow \boldsymbol{\theta}^*$ .
33:        $accepted \leftarrow 1$ .
34:     else
35:        $\boldsymbol{\theta}_{t+1} \leftarrow \boldsymbol{\theta}_t$ .
36:        $accepted \leftarrow 0$ .
37:     end if
38:   else
39:      $\boldsymbol{\theta}_{t+1} \leftarrow \boldsymbol{\theta}_t$ .
40:      $accepted \leftarrow 0$ .
41:   end if
42:    $\Sigma_s \leftarrow (1 - \gamma_s) \times \Sigma_{s-1} + \gamma_s \times (\boldsymbol{\theta}_{t+1} - \boldsymbol{\mu}_{s-1})^T (\boldsymbol{\theta}_{t+1} - \boldsymbol{\mu}_{s-1})$ .
43:    $\boldsymbol{\mu}_s \leftarrow (1 - \gamma_s) \times \boldsymbol{\mu}_{s-1} + \gamma_s \times \boldsymbol{\theta}_{t+1}$ .
44:    $\log(a_s) \leftarrow \log(a_{s-1}) + \gamma_s \times (accepted - 0.25)$ .
45:    $t++$ 
46: end loop
```

---

120 dataset is available to download as part of the code associated with this project.

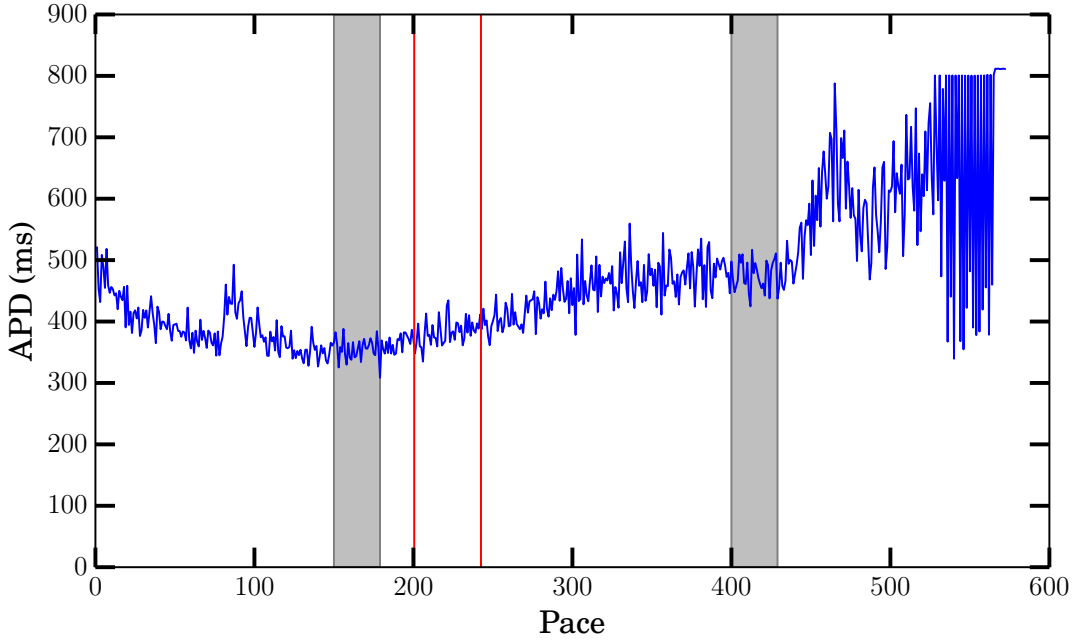

Figure B2: Summary of the whole patch clamp experiment. Action Potential Durations ( $APD_{90}$ ) are shown for every pace in the experiment. The first grey shaded region, at paces #150–179, shows the training data, at control. The first red line shows when  $10\mu\text{M}$  Moxifloxacin was added, the second when the bath KCl concentration was increased to  $5.4\text{mM}$  (raising the extracellular potassium concentration). The second shaded region, at paces #400–429, highlights the validation data paces. The shaded regions were chosen to be representative of the patch-clamped cell having settled to roughly steady behaviour in control and altered conditions. After pace  $\sim$  #450 the patch-clamp becomes unstable and action potentials lengthen until they are over 1 s long and we have 2 paces: 1 AP (at around pace #530, leading to an artefact in the plot by which the APD appears to be the full length of the trace, and then short on the next pace).

121 We adapted a method proposed by Dokos and Lovell (2004) to clamp the generated action  
 122 potential to the experimental voltage trace during just that part of the upstroke attributable to the  
 123 stimulus current.

124 The data clamp current takes the form

$$I_{\text{clamp}} = g_{\text{clamp}} (V - V_{\text{data}}). \quad (\text{B.8})$$

125 Dokos and Lovell (2004) used the integral of  $I_{\text{clamp}}$  as an objective function to minimise. We  
 126 simply use this method to ensure we are representing the effect of the stimulus current exactly,  
 127 and then let the action potential evolve as normal, and continue to calculate the likelihood as  
 128 before (see Section B2). To enable the CVODE solver to recover  $V_{\text{data}}$  at any time (it is taking  
 129 adaptive time steps), linear interpolation is performed. We coded this feature into Chaste (<http://www.cs.ox.ac.uk/chaste>) so the upcoming release v3.4 will allow a data clamp to be applied to  
 130 any CellML model. We switched on the data clamp by setting its conductance  $g_{\text{clamp}}$  to  $300\text{ mS}/\mu\text{F}$   
 131 during the time period shown in Figure B3, and zero otherwise.  
 132

133 We inferred conductances from each AP independently according to the following procedure



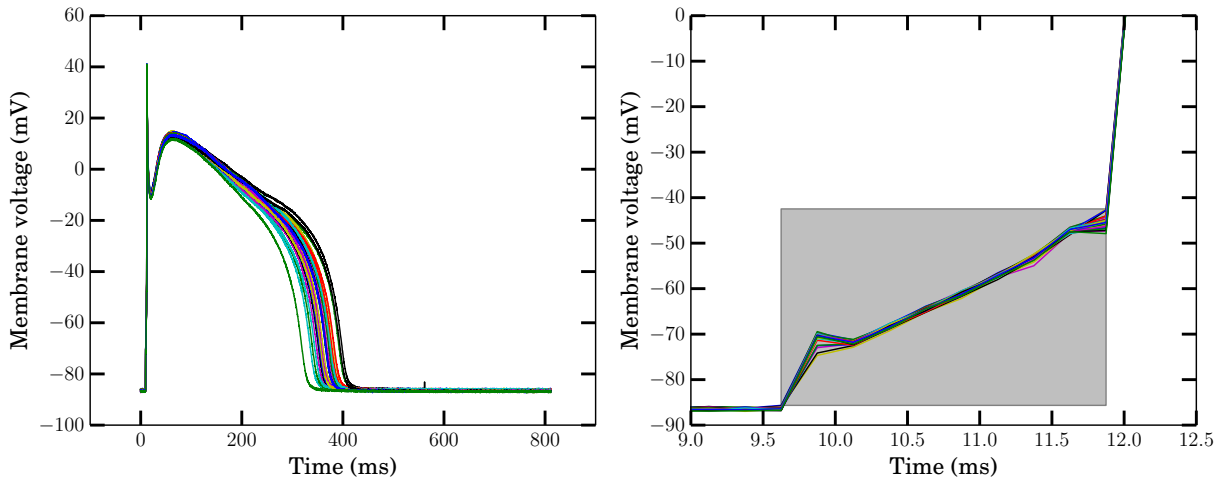

Figure B3: Left: Experimental action potential recordings of the 30 subsequent paces shown in Figure B2. Right: zoomed in view to show the effect of the experimentally-applied stimulus on membrane voltage. The grey box is overlaid to show the time in which we apply the data clamp current for each trace to ensure simulations follow the voltage time course throughout this time period.

- 134 • Set the intra- and extra-cellular potassium concentrations to the concentration of KCl in the  
135 experiment
- 136 • Set the initial voltage value to the initial voltage value in AP trace.
- 137 • Apply ‘data clamp current’ for a short time during the relevant part of the upstroke. We  
138 found this method was necessary to ensure that the main upstroke was provided by  $I_{Na}$  and  
139 not the applied stimulus current, particularly if assessing different models (not shown here).
- 140 • Turn off the data clamp allow the model to continue for a total of 1000 ms.
- 141 • Repeat this many times until the model reaches its steady state for its default parameters,  
142 defined by  $L_1$  norm of difference in state variables after successive paces being less than  $10^{-6}$ .
- 143 • Since the stimulus currents are highly consistent (Figure B3), we use the same steady state  
144 as initial conditions for fitting all traces.
- 145 • Perform CMA-ES runs followed by MCMC for each dog trace (#150–179), as described in  
146 the methods of the main text.

## 147 B6 Additional results for Section 2.2

148 Superimposed normalised histograms of inferred distributions for  $g_{K1}$ ,  $g_{Kr}$  and  $g_{Ks}$  using the ten  
149 Tusscher et al. model under two protocols are given in Figure B4. Note that all inferred distributions  
150 in the  $2[K^+]_o$  protocol are shifted to the left, i.e. the inferred conductance values are generally  
151 smaller.

152 A summary of which conductances were successfully inferred from the ten Tusscher et al. (2004),  
153 O’Hara et al. (2011) and Davies et al. (2012) models is given in Table B1. All conductances were  
154 successfully inferred for the four simpler models.

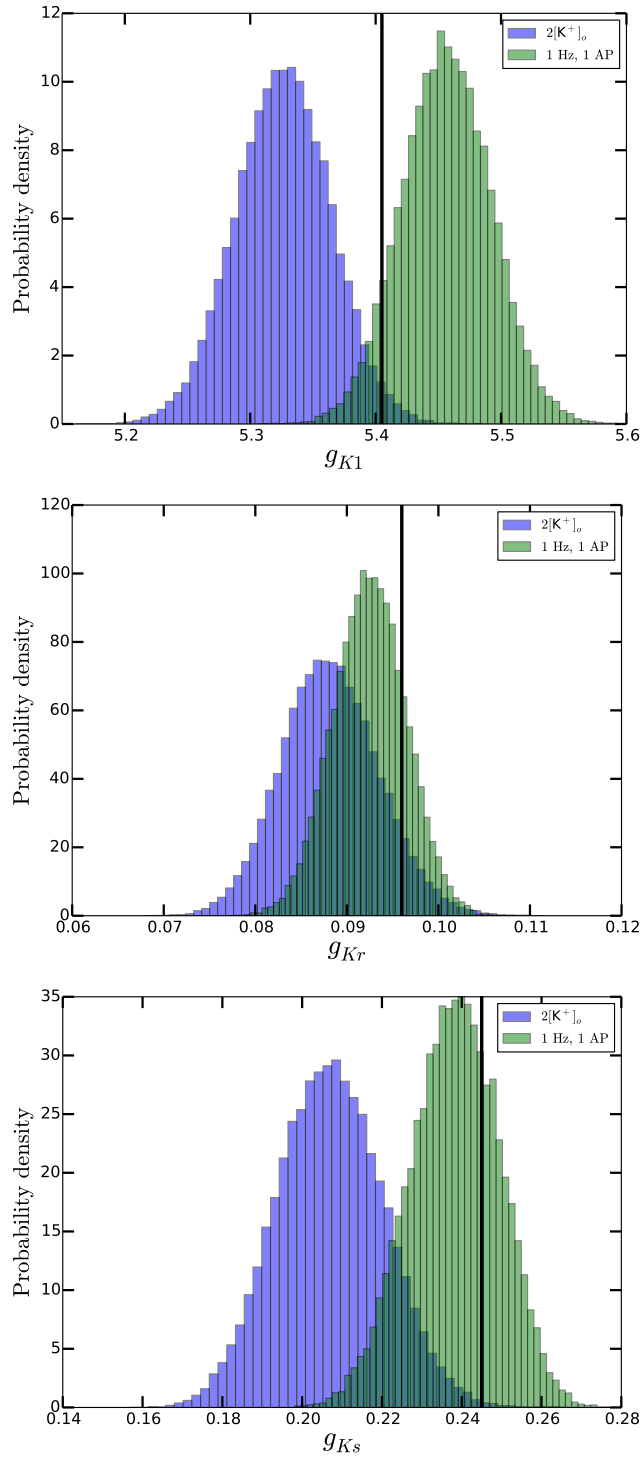

Figure B4: Superimposed normalised histograms for  $g_{K1}$ ,  $g_{Kr}$  and  $g_{Ks}$  for two protocols using the ten Tusscher et al. model. The blue histograms are from the  $2[K^+]_o$  protocol, the green are from the 1 Hz single AP protocol. The vertical black lines are the original values given in the model.

| Parameter                  | Protocol     |                                           |                                         |                   |                                        |          |          |          |          |              |              |
|----------------------------|--------------|-------------------------------------------|-----------------------------------------|-------------------|----------------------------------------|----------|----------|----------|----------|--------------|--------------|
|                            | 1 Hz<br>1 AP | 0.5[K <sup>+</sup> ] <sub>o</sub><br>1 AP | 2[K <sup>+</sup> ] <sub>o</sub><br>1 AP | 1 & 2 Hz<br>3 APs | 1 Hz for 2000 ms, $G_x = 0$ at 1000 ms |          |          |          |          | 1 Hz<br>10 s | 1 Hz<br>20 s |
|                            |              |                                           |                                         |                   | $G_{CaL}$                              | $G_{K1}$ | $G_{Kr}$ | $G_{Ks}$ | $G_{to}$ |              |              |
| ten Tusscher et al. (2004) |              |                                           |                                         |                   |                                        |          |          |          |          |              |              |
| $G_{Na}$                   | ✓            | ✓                                         | ✓                                       | ✓                 | ✓                                      | ✓        | ✓        | ✓        | ✓        | ✓            | ✓            |
| $G_{CaL}$                  | ✓            | ✓                                         | ✓                                       | ✓                 | ✓                                      | ✓        | ✓        | ✓        | ✓        | ✓            | ✓            |
| $G_{K1}$                   | ✓            | ✓                                         | ✓                                       | ✓                 | ✓                                      | ✓        | ✓        | ✓        | ✓        | ✓            | ✓            |
| $G_{Kr}$                   | ✓            | ✓                                         | ✗                                       | ✓                 | ✓                                      | ✓        | ✓        | ✓        | ✓        | ✓            | ✓            |
| $G_{Ks}$                   | ✓            | ✓                                         | ✗                                       | ✓                 | ✓                                      | ✓        | ✓        | ✓        | ✓        | ✓            | ✓            |
| $k_{NaCa}$                 | ✗            | ✗                                         | ✗                                       | ✓                 | ✓                                      | ✓        | ✓        | ✗        | ✓        | ✓            | ✓            |
| $G_{to}$                   | ✓            | ✓                                         | ✓                                       | ✓                 | ✓                                      | ✓        | ✓        | ✓        | ✓        | ✓            | ✓            |
| $G_{bCa}$                  | ✗            | ✗                                         | ✗                                       | ✗                 | ✗                                      | ✗        | ✗        | ✗        | ✗        | ✗            | ✓            |
| $G_{bNa}$                  | ✗            | ✗                                         | ✗                                       | ✗                 | ✗                                      | ✗        | ✗        | ✗        | ✗        | ✗            | ✓            |
| $G_{pCa}$                  | ✗            | ✗                                         | ✗                                       | ✓                 | ✓                                      | ✓        | ✓        | ✓        | ✓        | ✓            | ✓            |
| $G_{pK}$                   | ✓            | ✓                                         | ✓                                       | ✓                 | ✓                                      | ✓        | ✓        | ✓        | ✓        | ✓            | ✓            |
| $P_{NaK}$                  | ✗            | ✗                                         | ✗                                       | ✗                 | ✗                                      | ✓        | ✓        | ✗        | ✗        | ✓            | ✓            |
| O'Hara et al. (2011)       |              |                                           |                                         |                   |                                        |          |          |          |          |              |              |
| $G_{Na}$                   | ✓            | ✓                                         | ✓                                       | ✓                 | ✓                                      | ✓        | ✓        | ✓        | ✓        | ✓            | ✓            |
| $G_{CaL}$                  | ✗            | ✓                                         | ✗                                       | ✓                 | ✓                                      | ✓        | ✓        | ✓        | ✓        | ✓            | ✓            |
| $G_{bK}$                   | ✗            | ✗                                         | ✗                                       | ✓                 | ✓                                      | ✓        | ✓        | ✓        | ✗        | ✓            | ✓            |
| $G_{K1}$                   | ✓            | ✓                                         | ✓                                       | ✓                 | ✓                                      | ✓        | ✓        | ✓        | ✓        | ✓            | ✓            |
| $G_{Kr}$                   | ✓            | ✓                                         | ✓                                       | ✓                 | ✓                                      | ✓        | ✓        | ✓        | ✓        | ✓            | ✓            |
| $G_{Ks}$                   | ✗            | ✗                                         | ✗                                       | ✓                 | ✓                                      | ✓        | ✓        | ✓        | ✗        | ✓            | ✓            |
| $k_{NaCa}$                 | ✗            | ✗                                         | ✗                                       | ✓                 | ✓                                      | ✓        | ✓        | ✓        | ✓        | ✓            | ✓            |
| $P_{NaK}$                  | ✗            | ✗                                         | ✗                                       | ✗                 | ✓                                      | ✗        | ✓        | ✗        | ✗        | ✓            | ✓            |
| $G_{to}$                   | ✓            | ✓                                         | ✓                                       | ✓                 | ✓                                      | ✓        | ✓        | ✓        | ✓        | ✓            | ✓            |
| $G_{bCa}$                  | ✗            | ✗                                         | ✗                                       | ✗                 | ✗                                      | ✗        | ✗        | ✗        | ✗        | ✗            | ✓            |
| $G_{bNa}$                  | ✗            | ✗                                         | ✗                                       | ✗                 | ✗                                      | ✗        | ✗        | ✗        | ✗        | ✗            | ✓            |
| $G_{pCa}$                  | ✗            | ✗                                         | ✗                                       | ✗                 | ✗                                      | ✗        | ✗        | ✗        | ✗        | ✗            | ✓            |
| $G_{NaL}$                  | ✓            | ✓                                         | ✗                                       | ✓                 | ✓                                      | ✓        | ✓        | ✓        | ✓        | ✓            | ✓            |
| Davies et al. (2012)       |              |                                           |                                         |                   |                                        |          |          |          |          |              |              |
| $G_{Na}$                   | ✓            | ✓                                         | ✓                                       | ✓                 | ✓                                      | ✓        | ✓        | ✓        | ✓        | ✓            | ✓            |
| $G_{CaL}$                  | ✓            | ✓                                         | ✓                                       | ✓                 | ✓                                      | ✓        | ✓        | ✓        | ✓        | ✓            | ✓            |
| $G_{K1}$                   | ✓            | ✓                                         | ✓                                       | ✓                 | ✓                                      | ✓        | ✓        | ✓        | ✓        | ✓            | ✓            |
| $G_{pK}$                   | ✗            | ✓                                         | ✗                                       | ✓                 | ✓                                      | ✓        | ✓        | ✓        | ✓        | ✓            | ✓            |
| $G_{Ks}$                   | ✗            | ✗                                         | ✗                                       | ✗                 | ✗                                      | ✗        | ✗        | ✓        | ✓        | ✓            | ✓            |
| $G_{Kr}$                   | ✗            | ✗                                         | ✗                                       | ✓                 | ✓                                      | ✓        | ✓        | ✓        | ✓        | ✓            | ✓            |
| $G_{pCa}$                  | ✗            | ✗                                         | ✗                                       | ✗                 | ✗                                      | ✗        | ✗        | ✗        | ✗        | ✗            | ✗            |
| $G_{bCa}$                  | ✗            | ✗                                         | ✗                                       | ✗                 | ✗                                      | ✗        | ✗        | ✗        | ✗        | ✗            | ✓            |
| $k_{NaCa}$                 | ✗            | ✓                                         | ✓                                       | ✓                 | ✓                                      | ✓        | ✓        | ✓        | ✓        | ✓            | ✓            |
| $P_{NaK}$                  | ✗            | ✗                                         | ✗                                       | ✓                 | ✓                                      | ✗        | ✓        | ✓        | ✓        | ✓            | ✓            |
| $G_{to1}$                  | ✓            | ✓                                         | ✓                                       | ✓                 | ✓                                      | ✓        | ✓        | ✓        | ✓        | ✓            | ✓            |
| $G_{to2}$                  | ✓            | ✗                                         | ✗                                       | ✓                 | ✓                                      | ✓        | ✓        | ✓        | ✓        | ✓            | ✓            |
| $G_{bCl}$                  | ✗            | ✗                                         | ✗                                       | ✗                 | ✗                                      | ✗        | ✗        | ✗        | ✗        | ✗            | ✗            |
| $G_{NaL}$                  | ✗            | ✗                                         | ✗                                       | ✓                 | ✓                                      | ✓        | ✓        | ✓        | ✓        | ✓            | ✓            |

Table B1: Inference success for each conductance in the ten Tusscher et al. (2004), O'Hara et al. (2011) and Davies et al. (2012) models. The other four models had every parameter successfully inferred for every protocol.

155 **B6.1 Prediction of beat-to-beat variability in a canine myocyte**

156 Figure B5 shows the result of taking the maximum likelihood conductances that were inferred from  
157 each pace at control, and using these to predict changes to the action potential under the addition  
158 of  $10\ \mu\text{M}$  Moxifloxacin and  $5.4\ \text{mM}$  KCl rather than  $4\ \text{mM}$ , as described in Section 2.1.2. The model  
159 consistently predicted a lower resting potential, and a shorter APD than the experiment. This could  
160 be due to the experiment not having reached a steady-state response, the resting potential was still  
161 dropping at paces #400–429 (not shown, but full dataset is available to download). The original  
162 model parametrisation behaves the same way, so whatever the cause, this is not purely a product  
163 of our re-parametrisation procedure.

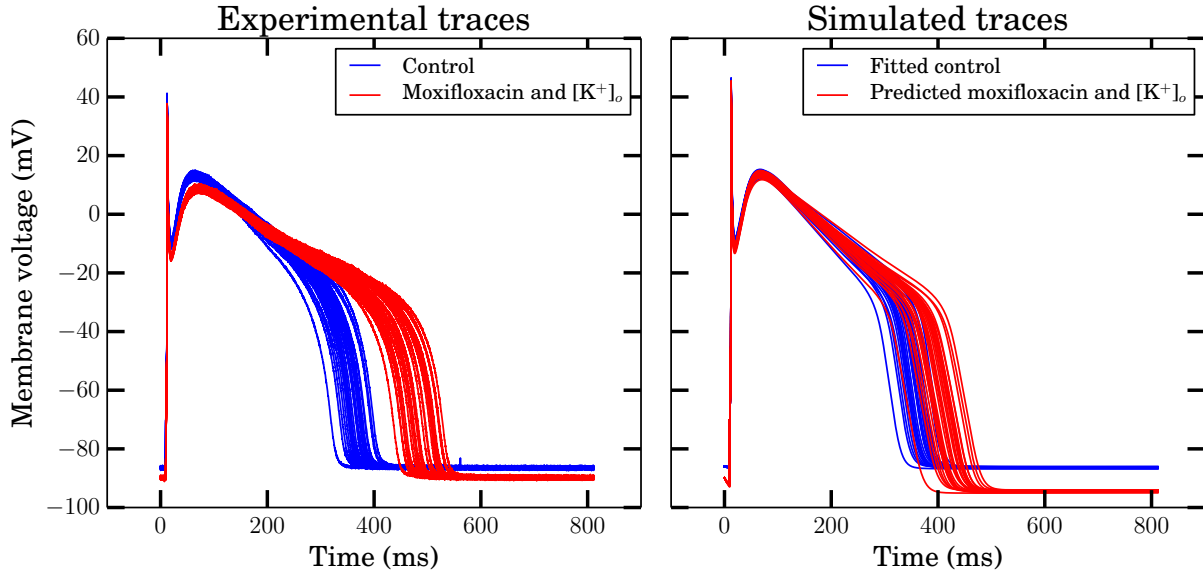

Figure B5: Left: blue — experimental APs #150–179, and red — experimental APs #400–429. Right: blue — simulated APs using maximum likelihood conductances inferred from experimental paces #150–179, and red — predicted APs using the same parameters under Moxifloxacin and raised extracellular potassium concentration.

164 In Figure B6 we plot the dispersion of APDs that are present in the data shown in Figure B5.  
165 There is a good correspondence in predicted beat-to-beat variability, with an increase relative to the  
166 control situation. The slight underestimate of variability in the simulation predictions is consistent  
167 with the observation that longer APDs lend themselves to higher variability (Heijman et al., 2013),  
168 and so we would expect that a model which reproduced the baseline response more closely may also  
169 improve the beat-to-beat variability predictions.

170 The fact that the model predictions are not very good for the absolute APD and resting potential  
171 indicates that Structural Uncertainty may be playing a large role. This may be caused by differences  
172 between the experimental preparation and its approximation in our simulations, rather than simply  
173 the model being inadequate/untested for simulating altered extracellular potassium and block of  
174 ion channels.

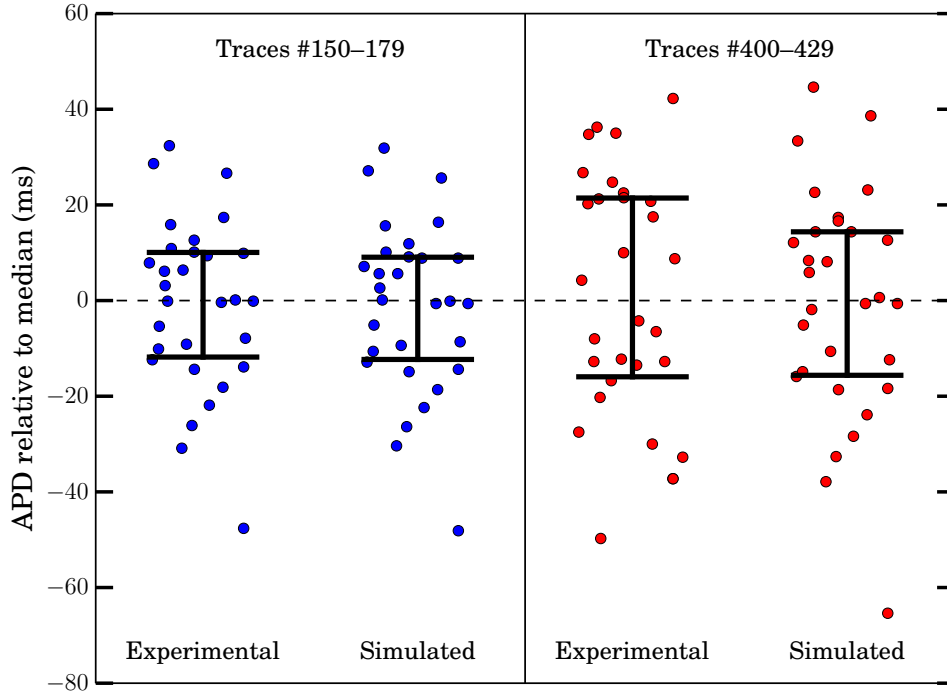

Figure B6: Dispersion of APD in the datasets shown in Figure B5. Left: in the training dataset, from traces #150–179. Right: in the prediction dataset, traces #400–429. Quartiles overlaid.

## C Case Study 2: introduction to GP emulators

A Gaussian Process is a distribution over functions, that generalises classical regression (Rasmussen and Williams, 2006). A GP is parametrized by two functions: a mean function and a covariance function. The GP with mean function  $m(\mathbf{x})$  and covariance function  $c(x, x')$  is the unique distribution on function  $f$  such that given any number of fixed test inputs  $\mathbf{x}_1, \dots, \mathbf{x}_n$ , the values of  $f$  at  $\mathbf{x}_1, \dots, \mathbf{x}_n$  are jointly Gaussian, with mean  $m(\mathbf{x}_1), \dots, m(\mathbf{x}_n)$ , and with covariance matrix  $c(\mathbf{x}_i, \mathbf{x}_j)$ . Thus,  $m$  describes a trend, while  $c$  encodes how much the value of  $f$  at different inputs should be correlated. GPs have been widely used in statistics, as they enjoy many desirable computational properties. In particular, conditioning a GP on training points, where one has evaluated the target function, still yields a GP posterior distribution on  $f$ , the mean and covariance functions of which can be analytically computed.

In this supporting information, we provide a simple example of emulation, and then include details of the mathematics that underpin the GP emulator work described in Case Study 2. A much more in-depth coverage of Gaussian process (GP) emulators is given in the MUCM webpages and the toolkit that has been developed there <http://mucm.aston.ac.uk/MUCM/MUCMToolkit/index.php>. Our aim here is to describe the pathway through this material that was followed for the present study.

### C1 Simple example

Figure C7 illustrates the results of GP emulation of a simple hypothetical computational model. For this example, the computational model is assumed to be dependent on one input parameter,

195 and provides one output parameter of interest. Suppose this computational model is expensive to  
 196 run, but that the model has been run at 6 values of model input parameter, (0, 0.2, 0.4, 0.6, 0.8, 1).  
 197 These values, and the corresponding model outputs, are the design data for the emulator. The  
 198 emulator is constructed from the design data, and the result includes an expectation function (solid  
 199 line in figure), which is the prediction of what the model output is at other inputs, and can be  
 200 used as a surrogate for the original computational model. The emulator also provides a variance  
 201 function (represented by the shaded region), which represents uncertainty of the emulator output  
 202 as a function of model input values. Therefore, the variance is zero at design points (where there is  
 203 no uncertainty since the model was run at these points), and increases away from design points.

204 In general, a *meta-model* is defined as a surrogate for a model (for example, a simple polynomial  
 205 interpolant through the data points in Figure C7), and an emulator is defined as a meta-model that  
 206 also provides uncertainty in the prediction.

207 Once constructed, an emulator can be tested (validated) by running the model again (e.g. at  
 208 input = 0.5 say) and comparing the emulator prediction with the model output, given the emulator  
 209 uncertainty. If the model result at this new input is several standard deviations away from the  
 210 expected value, this suggests the emulator requires improvement (by using more design data, say).

211 Now suppose we have some real data on the input parameter, and can generate a probability  
 212 density function for it. This is represented in the figure with the distribution illustrated on the input  
 213 axis; here we have assumed the input was observed to have mean value 0.8 and standard deviation  
 214 0.04. (This is the uncertainty characterisation stage). Then, the uncertainty propagation stage  
 215 involves computing the corresponding distribution of the model output, which is also illustrated  
 216 in the figure. This could be performed using Monte Carlo sampling and repeatedly running the  
 217 original model (which could be infeasible if the model is very expensive to run), or alternatively using  
 218 Monte Carlo sampling and repeatedly evaluating the emulator predictions. However, if the input is  
 219 discovered or assumed to be Normally distributed, there is an analytic description of the mean and  
 220 variance of the output, which can be computed directly from emulator properties. (The emulator's  
 221 uncertainty regarding the model output is also accounted for in this analytic description). Therefore,  
 222 uncertainty propagation can be performed without the need for additional sampling. Hence, GP  
 223 emulators can be especially useful even for computational models that are not very expensive to  
 224 solve.

## 225 C2 Emulator implementation

226 The GP emulators used in this study were constructed using the approach described in the MUCM  
 227 web pages, and full mathematical details are given in the supporting information to (Chang et al.,  
 228 2015).

229 Briefly, each TP06 emulator was described by a Gaussian process (GP),

$$\mathcal{GP}(\mathbf{x}) = h(\mathbf{x})^T \beta + \sigma^2 c(\mathbf{x}, \mathbf{x}'). \quad (\text{C.9})$$

230 which was composed of a linear mean function  $m(\mathbf{x}) = h(\mathbf{x})^T \beta$ , where  $h(\mathbf{x}) = (1, \mathbf{x})^T$  such that

$$h(\mathbf{x})^T \beta = \beta_0 + \beta_1 x_1 + \dots + \beta_P x_P, \quad (\text{C.10})$$

231 and a Gaussian covariance function  $\sigma^2 c(\mathbf{x}, \mathbf{x}')$ , with

$$c(\mathbf{x}_1, \mathbf{x}_2) = \exp \left[ - \sum_{p=1}^P \left\{ \frac{(x_{p,1} - x_{p,2})}{\delta_p} \right\}^2 \right]. \quad (\text{C.11})$$

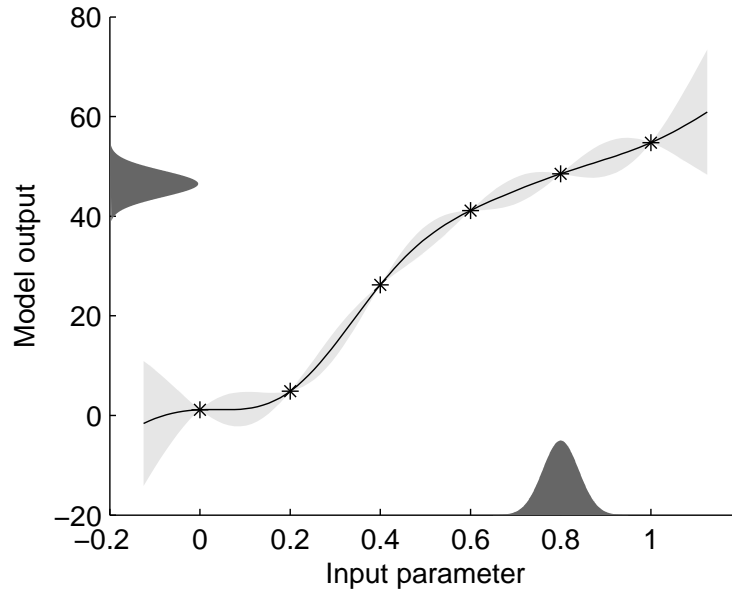

Figure C7: Emulation of a model that takes in a single input. Stars: inputs and corresponding outputs at which the original model was run. Line: expectation function of the emulator, i.e. the predicted value of the model at other inputs. Light shaded area: a representation of the uncertainty of the prediction by the emulator—one standard deviation above and below the predicted value. Dark shaded area: illustration of an example input distribution that might be observed from data (uncertainty characterisation stage), and illustration of the corresponding output distribution (uncertainty propagation stage). This figure was created by recreating the MUCM example <http://mucm.aston.ac.uk/MUCM/MUCMToolkit/index.php?page=ExamCoreGP1Dim.html>, although the absolute values were altered.

232 In these equations  $\mathbf{x} = (x_1, x_2, \dots, x_P)$  are  $P$  model inputs,  $\beta$  and  $\delta$  are vectors of length  
 233  $P$ , and  $\sigma^2$  is a scalar. The emulator is specified by the hyperparameters  $\beta$ ,  $\delta$ , and  $\sigma^2$ . These  
 234 hyperparameters were obtained by fitting the emulator to the design data, assuming a flat prior on  
 235  $\delta$  of 1.0, and then maximising the posterior likelihood given the design data as detailed in (Chang  
 236 et al., 2015).

### 237 C3 Emulator validation

238 The emulators were validated by generating an additional set of test data, comprising inputs and  
 239 outputs from 10 model runs. For each set of inputs in the test data, the outputs obtained from the  
 240 emulator were compared with the outputs obtained from the AP model for the same inputs, and  
 241 the differences were compared using the Mahalanobis distance (Bastos and O’Hagan, 2009; Chang  
 242 et al., 2015)

243 The Mahalanobis distance for the complete set of test data was a measure of overall agreement  
 244 between the predicted and test data. The results are summarised in Table C2, where the second  
 245 column shows the reference distribution for the Mahalanobis distance. For design data with 50 sets  
 246 of input and output data, the Mahalanobis distance for each emulator was within one standard  
 247 deviation of the mean of the reference distribution, so these emulators were judged to be a good  
 248 trade off between emulator fit and the number of model runs required to generate the design data,  
 249 and were used for all the results described in the main text.

Table C2: Mahalanobis distance for each of the six TP06 emulators: fitted with  $n = 25, 50$  and 100 design points.

| Design data | Mean (SD)  | Max $dV_m/dt$ | Max $V_m$ | Dome $V_m$ | APD <sub>90</sub> | Rest $V_m$ | APD <sub>50</sub> |
|-------------|------------|---------------|-----------|------------|-------------------|------------|-------------------|
| $n = 25$    | 10 (12.87) | 18.2897       | 13.0487   | 10.1815    | 15.6885           | 14.2972    | 18.2897           |
| $n = 50$    | 10 (5.24)  | 10.7534       | 5.8113    | 5.488      | 7.4894            | 8.9025     | 10.3506           |
| $n = 100$   | 10 (7.12)  | 10.5641       | 11.1173   | 17.5544    | 10.0706           | 10.8453    | 9.6464            |

#### 250 **C4 Emulator Implementation**

251 All of the code for this study was implemented in Matlab, using expressions detailed in the MUCM  
 252 toolkit (<http://mucm.aston.ac.uk/MUCM/MUCMToolkit/>). The code was tested against the nu-  
 253 merical examples provided in the toolkit.

254 Further details of the methods used to calculate the mean effects and sensitivity indices are  
 255 given in (Chang et al., 2015).



## References

- 256
- 257 Bastos, L. S., O’Hagan, A., Nov. 2009. Diagnostics for Gaussian Process Emulators. *Technometrics*  
258 51 (4), 425–438.
- 259 Chang, E., Strong, M., Clayton, R., 2015. Bayesian sensitivity analysis of a cardiac cell model using  
260 a Gaussian process emulator. *PLoS ONE* 10 (6), e0130252.
- 261 Cooper, J., Spiteri, R. J., Mirams, G. R., Jan. 2014. Cellular cardiac electrophysiology modeling  
262 with Chaste and CellML. *Frontiers in Physiology* 5, 511.
- 263 Cordeiro, J., Mazza, M., Goodrow, R., Ulahannan, N., Antzelevitch, C., Di Diego, J., 2008. Func-  
264 tionally distinct sodium channels in ventricular epicardial and endocardial cells contribute to a  
265 greater sensitivity of the epicardium to electrical depression. *American Journal of Physiology-  
266 Heart and Circulatory Physiology* 295 (1), H154–H162.
- 267 Davies, M., Mistry, H., Hussein, L., Pollard, C., Valentin, J.-P., Swinton, J., Abi-Gerges, N., 2012.  
268 An in silico canine cardiac midmyocardial action potential duration model as a tool for early drug  
269 safety assessment. *American Journal of Physiology - Heart and Circulatory Physiology* 302 (7),  
270 H1466–H1480.
- 271 Dokos, S., Lovell, N. H., 2004. Parameter estimation in cardiac ionic models. *Progress in biophysics  
272 and molecular biology* 85 (2-3), 407–31.
- 273 Hansen, N., 2006. The cma evolution strategy: a comparing review. In: *Towards a new evolutionary  
274 computation*. Springer, pp. 75–102.
- 275 Heijman, J., Zaza, A., Johnson, D. M., Rudy, Y., Peeters, R. L. M., Volders, P. G. A., Westra, R. L.,  
276 Aug. 2013. Determinants of Beat-to-Beat Variability of Repolarization Duration in the Canine  
277 Ventricular Myocyte: A Computational Analysis. *PLoS Computational Biology* 9 (8), e1003202.
- 278 Hunter, J. D., 2007. Matplotlib: A 2d graphics environment. *Computing in science and engineering*  
279 9 (3), 90–95.
- 280 Lloyd, C., Lawson, J., Hunter, P., Nielsen, P., 2008. The CellML model repository. *Bioinformatics*  
281 24 (18), 2122–2123.
- 282 Mirams, G., Arthurs, C., Bernabeu, M., Bordas, R., Cooper, J., Corrias, A., Davit, Y., Dunn, S.-J.,  
283 Fletcher, A., Harvey, D., Marsh, M., Osborne, J., Pathmanathan, P., Pitt-Francis, J., Southern,  
284 J., Zenzemi, N., Gavaghan, D., 2013. Chaste: an open source C++ library for computational  
285 physiology and biology. *PLOS Computational Biology* 9 (3), e1002970.
- 286 Murphy, L., Renodin, D., Antzelevitch, C., Di Diego, J., Cordeiro, J., 2011. Extracellular pro-  
287 ton depression of peak and late Na<sup>+</sup> current in the canine left ventricle. *American Journal of  
288 Physiology—Heart and Circulatory Physiology* 301 (3), H936–H944.
- 289 O’Hara, T., Virág, L., Varró, A., Rudy, Y., 2011. Simulation of the undiseased human cardiac  
290 ventricular action potential: model formulation and experimental validation. *PLoS computational  
291 biology* 7 (5), e1002061.
- 292 Pathmanathan, P., Shotwell, M. S., Gavaghan, D. J., Cordeiro, J. M., Gray, R. A., 2015. Uncertainty  
293 quantification of fast sodium current steady-state inactivation for multi-scale models of cardiac  
294 electrophysiology. *Progress in Biophysics and Molecular Biology* 117 (1), 4–18.

- 295 Rasmussen, C. E., Williams, C. K. I., 2006. Gaussian Processes for Machine Learning. MIT Press.
- 296 ten Tusscher, K., Noble, D., Noble, P. J., Panfilov, A. V., 2004. A model for human ventricular  
297 tissue. *Am. J. Physiol. Heart Circ. Physiol.* 286 (4), 1573–1589.
- 298 Van Der Walt, S., Colbert, S. C., Varoquaux, G., 2011. The numpy array: a structure for efficient  
299 numerical computation. *Computing in Science & Engineering* 13 (2), 22–30.
